# Supplementary material
Source: Springer Nature journal article supplement (https://www.springermedizin.de/resource/supplementary/12890_2011_256_MOESM1_ESM.pdf/9504808)

**(A)**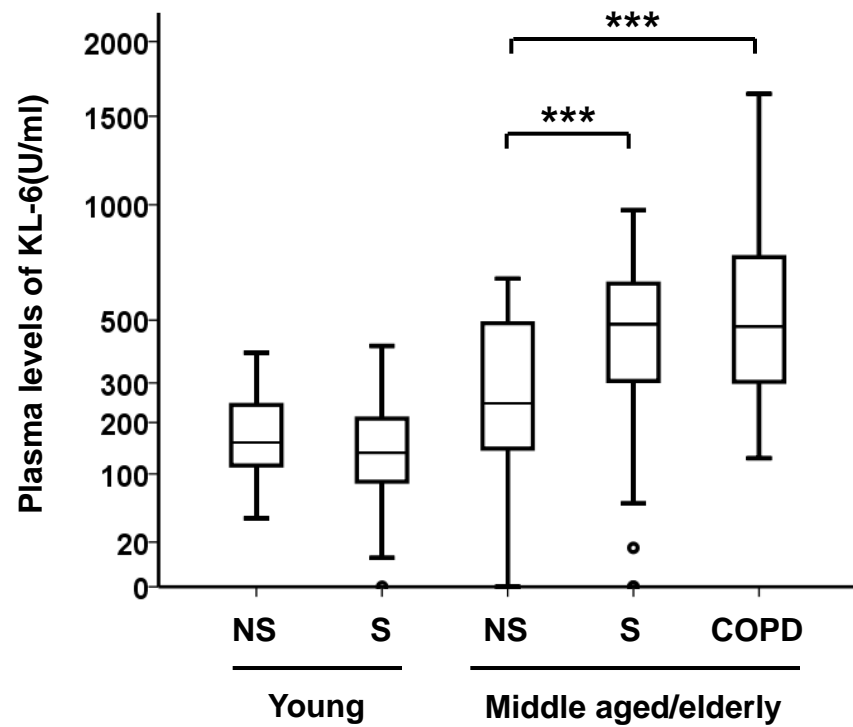**(B)**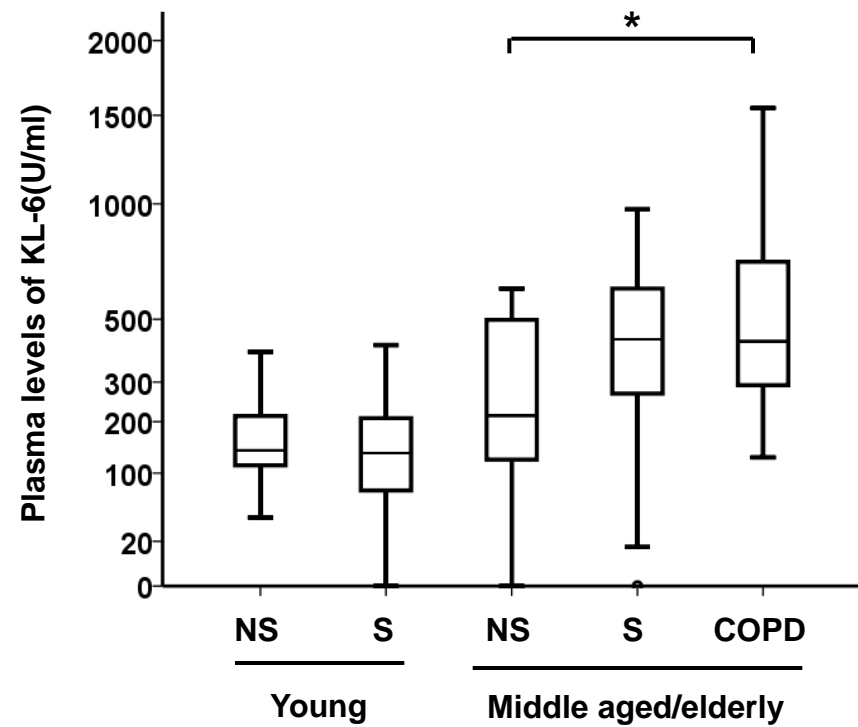

Supplement: MOESM1 [file 9504808]
